# Supplementary material for: Regression Analysis of Combined Gene Expression Regulation in Acute Myeloid Leukemia
Source: PubMed Central journal article supplement (PMC4207489; doi:10.1371/journal.pcbi.1003908), 2014-10-23
Supplement: pcbi.1003908.s006.pdf [file pcbi.1003908.s006.pdf]

Table S1: Summary statistics in regression step 1 and 2

|                            | Spearman at stage 1 & 2 |           | RACER vs X: p.value < |          |
|----------------------------|-------------------------|-----------|-----------------------|----------|
| RACER                      | 6.00E-01                | 4.63E-01  | not applicable        |          |
| RACER, all excluding CNV   | 5.97E-01                | 4.59E-01  | 1.73E-01              | 7.75E-03 |
| RACER, all excluding miRNA | 5.96E-01                | 4.50E-01  | 7.41E-02              | 3.13E-08 |
| RACER, all excluding DM    | 5.65E-01                | 4.33E-01  | 1.07E-44              | 2.54E-16 |
| RACER, all excluding TF    | 4.30E-01                | 1.54E-01  | 3.42E-54              | 0.00E+00 |
| Random                     | -1.83E-03               | -1.65E-03 | 1.17E-58              | 0.00E+00 |

RACER: full model; RACER, all excluding X: full model without using variable X  $\in$  {CNV: copy number variation, miRNA: miRNA expression and seed match, DM: DNA methylation, TF: transcription factor binding signals}; RANDOM: full RACER on expression data with randomly shuffled gene symbols. Spearman at stage 1 & 2: Median Spearman correlation coefficients at regression stage 1 (Eq 1) and 2 (Eq 2) for each model, respectively. “RACER vs X: p.value <”: p-values indicate how significantly higher the Spearman of the full RACER model comparing with each reduced model based on one-sided Wilcoxon rank-sum test at regression step 1 and 2, respectively.
