# Supplementary material for: Regression Analysis of Combined Gene Expression Regulation in Acute Myeloid Leukemia
Source: PLoS Comput Biol. 2014 Oct 23;10(10):e1003908. doi: 10.1371/journal.pcbi.1003908 (PMC4207489; doi:10.1371/journal.pcbi.1003908)
Supplement: Table S2 — Feature selection results for the TF/miRNA regulators. (XLSX) [file pcbi.1003908.s007.xlsx]

## Sheet: Sheet1
feat	fstats	pval	FDR
PHF8	1565.63	0	0
Max	112.817	2.89145e-26	8.19726e-24
MAZ	64.1352	1.24058e-15	2.3447e-13
ZBTB7A	50.2889	1.3822e-12	1.95927e-10
PU1	31.4961	2.0314e-08	2.30361e-06
CCNT2	29.318	6.23048e-08	5.8878e-06
hsa-miR-506	28.7279	8.44445e-08	6.84e-06
NRSF	25.2023	5.2172e-07	3.69769e-05
RFX5	23.8182	1.06893e-06	6.73423e-05
CHD1	23.1443	1.51653e-06	8.59871e-05
Egr-1	21.8511	2.97044e-06	0.000153113
YY1	19.601	9.60493e-06	0.000453833
C-Fos	17.3878	3.06371e-05	0.00133625
ZNF143	15.2913	9.25197e-05	0.00374705
CEBPB	14.1134	0.00017272	0.00652883
hsa-miR-548p	13.3298	0.000262048	0.00928633
ELF1	10.2986	0.00133396	0.0444914
BCLAF1	9.28963	0.00230829	0.072711
TAF1	8.40422	0.00374858	0.111866
Pol2	8.15001	0.00431161	0.116413
hsa-miR-936	8.21477	0.00416047	0.116413
HMGN3	7.76881	0.00532184	0.137158
C-Myc	7.58531	0.0058912	0.145231
hsa-miR-200b	7.20001	0.00729778	0.17241
Nrf1	6.9309	0.00848002	0.186248
hsa-miR-1911	6.91819	0.00854046	0.186248
MafF	6.83689	0.00893776	0.187693
hsa-miR-133b	6.64309	0.00996294	0.20175
hsa-miR-507	6.5092	0.0107409	0.210004
hsa-miR-1909	6.02736	0.0140963	0.266421
NF-YB	5.69192	0.0170547	0.311935
hsa-miR-1200	5.37171	0.0204784	0.362852
hsa-miR-1913	5.31565	0.0211473	0.363349
CHD2	5.18007	0.0228604	0.381231
hsa-miR-1226	4.89349	0.0269722	0.415928
hsa-miR-145	4.84524	0.0277368	0.415928
hsa-miR-206	4.93067	0.0263979	0.415928
hsa-miR-346	4.83665	0.0278752	0.415928
hsa-miR-1229	4.77085	0.02896	0.421034
hsa-miR-148a	4.58148	0.0323343	0.458338
GABP	4.53852	0.0331554	0.458516
JunD	4.34853	0.0370566	0.500264
ZNF263	4.19784	0.0404918	0.511324
hsa-miR-155	4.22879	0.0397599	0.511324
hsa-miR-223	4.19409	0.0405813	0.511324
hsa-miR-412	3.80416	0.0511427	0.63039
HDAC6	3.418	0.0645075	0.70338
RBBP5	3.4274	0.0641414	0.70338
SP2	3.41876	0.0644776	0.70338
hsa-miR-1233	3.44124	0.0636061	0.70338
hsa-miR-650	3.45113	0.0632267	0.70338
hsa-miR-937	3.45492	0.0630819	0.70338
hsa-miR-518e	3.2079	0.0733022	0.784195
hsa-miR-588	3.14462	0.0761969	0.800067
hsa-miR-1303	2.79917	0.0943324	0.963691
hsa-miR-543	2.78484	0.0951794	0.963691
hsa-miR-2113	2.71325	0.0995378	0.973067
hsa-miR-892b	2.73837	0.0979844	0.973067
ARID3A	0.0222522	0.88142	1
ATF1	0.0276264	0.867992	1
ATF3	0.111986	0.737898	1
BCL3	0.00349391	0.952866	1
BDP1	0.00678974	0.93433	1
BHLHE40	0	1	1
BRF1	0.0008679	0.976498	1
BRF2	0.176734	0.674201	1
Bach1	0.102655	0.74867	1
Brg1	0.000364273	0.984773	1
C-Jun	0	1	1
CBX3	0.914469	0.338946	1
COREST	0.061206	0.804603	1
CTCF	0	1	1
E2F6	0.10432	0.74671	1
ELK1	0.0544207	0.815545	1
ETS1	0	1	1
EZH2	0.0144902	0.904187	1
FOS	0.873254	0.35007	1
FOSL1	0.812041	0.367531	1
GATA-1	0	1	1
GATA2	0.235646	0.627375	1
GTF2B	0.227166	0.633639	1
GTF2F1	0.0177238	0.894092	1
HDAC1	0.309796	0.577813	1
HDAC2	0.0278547	0.867453	1
HDAC8	1.9242	0.165414	1
Ini1	1.48179	0.223513	1
JunB	0	1	1
KAP1	2.38346	0.122645	1
MEF2A	0.099025	0.753007	1
MafK	0	1	1
Mxi1	0.0135256	0.907417	1
NELFe	0.0158237	0.899898	1
NF-E2	0.00821156	0.927798	1
NF-YA	0.00739206	0.931486	1
NR2F2	0.000146519	0.990342	1
PLU1	0.0308821	0.860506	1
PML	0.522343	0.469855	1
Pol3	0	1	1
RPC155	0	1	1
Rad21	0.000575569	0.98086	1
SAP30	0.588369	0.443062	1
SETDB1	1.37839	0.240394	1
SIRT6	0.0701183	0.791168	1
SIX5	0.418077	0.517907	1
SMC3	0.543225	0.46111	1
SP1	0.000434255	0.983375	1
SRF	0.00219431	0.962639	1
STAT5A	0	1	1
Sin3Ak-20	0	1	1
TAF7	0	1	1
TAL1	0.0657486	0.797634	1
TBLR1	0.100888	0.75077	1
TBP	0.51469	0.473126	1
TEAD4	1.96056	0.161473	1
TFIIIC-110	0.895824	0.343918	1
THAP1	0.713692	0.398233	1
TR4	0	1	1
TRIM28	0.0529276	0.818048	1
UBF	0.00307842	0.955754	1
UBTF	0.227838	0.633138	1
USF-1	1.12733	0.288362	1
USF2	0.0214012	0.883693	1
ZBTB33	0.000246386	0.987477	1
ZNF274	8.45973e-05	0.992662	1
p300	0.018066	0.89308	1
hsa-let-7b	0.0410267	0.839489	1
hsa-let-7c	5.0217e-12	0.999998	1
hsa-let-7d	5.0217e-12	0.999998	1
hsa-let-7e	0	1	1
hsa-let-7g	0	1	1
hsa-let-7i	0	1	1
hsa-miR-100	0.132989	0.715358	1
hsa-miR-106a	0.32934	0.566056	1
hsa-miR-106b	7.21224e-05	0.993224	1
hsa-miR-107	0.0337416	0.85426	1
hsa-miR-10a	1.05832	0.303613	1
hsa-miR-10b	1.20905e-05	0.997226	1
hsa-miR-1178	0.788728	0.374498	1
hsa-miR-1179	0.0255992	0.872885	1
hsa-miR-1180	0.00648611	0.935812	1
hsa-miR-1181	0.00172976	0.966826	1
hsa-miR-1182	0.47204	0.49206	1
hsa-miR-1183	0.0150702	0.902298	1
hsa-miR-1184	0.206611	0.649442	1
hsa-miR-1197	0.00147838	0.96933	1
hsa-miR-1202	0.27078	0.602816	1
hsa-miR-1203	0.00906401	0.924153	1
hsa-miR-1204	0.000697114	0.978936	1
hsa-miR-1205	0.012989	0.909264	1
hsa-miR-1206	0.178393	0.672763	1
hsa-miR-1208	0.397141	0.528578	1
hsa-miR-122	0.172258	0.678118	1
hsa-miR-1227	0.182022	0.669647	1
hsa-miR-1228	0.035668	0.850205	1
hsa-miR-1231	0.046772	0.828781	1
hsa-miR-1234	0.00965896	0.921711	1
hsa-miR-1236	0.034068	0.853565	1
hsa-miR-1237	0.02736	0.868624	1
hsa-miR-1238	0.000324244	0.985634	1
hsa-miR-1243	0.00988615	0.920799	1
hsa-miR-1244	1.78356	0.181732	1
hsa-miR-1245	0.0161476	0.898884	1
hsa-miR-1246	0.424865	0.514529	1
hsa-miR-1247	0.745595	0.387887	1
hsa-miR-1248	0	1	1
hsa-miR-1249	0.142337	0.705974	1
hsa-miR-1250	0.0317599	0.858558	1
hsa-miR-1251	0.115905	0.733523	1
hsa-miR-1252	0.458669	0.498256	1
hsa-miR-1253	0.787058	0.375004	1
hsa-miR-1254	0	1	1
hsa-miR-1255a	0.0243292	0.876052	1
hsa-miR-1256	0.00166823	0.967421	1
hsa-miR-1257	0.0956255	0.757148	1
hsa-miR-1258	0	1	1
hsa-miR-126	2.34011	0.1261	1
hsa-miR-1260	0.00605697	0.937967	1
hsa-miR-1261	0.00560074	0.940344	1
hsa-miR-1262	0	1	1
hsa-miR-1263	0.00418288	0.948433	1
hsa-miR-1264	0.514348	0.473273	1
hsa-miR-1265	0	1	1
hsa-miR-1266	0.0782261	0.77972	1
hsa-miR-1267	0.823358	0.364214	1
hsa-miR-1268	0.546174	0.459896	1
hsa-miR-1269	0.00653252	0.935583	1
hsa-miR-1270	0	1	1
hsa-miR-1271	0.162462	0.686905	1
hsa-miR-1272	0.00279846	0.957812	1
hsa-miR-1273	0.452803	0.501016	1
hsa-miR-1275	0.0354433	0.850672	1
hsa-miR-1276	0.320664	0.571217	1
hsa-miR-1277	0	1	1
hsa-miR-1278	0	1	1
hsa-miR-1279	0.56291	0.453101	1
hsa-miR-1280	0.0292196	0.864275	1
hsa-miR-1281	0.929617	0.334977	1
hsa-miR-1282	0.00746565	0.931146	1
hsa-miR-1284	0.00545105	0.941146	1
hsa-miR-1286	0.0788235	0.778902	1
hsa-miR-1287	0.034059	0.853584	1
hsa-miR-1288	2.26362	0.132463	1
hsa-miR-1290	0.639694	0.423834	1
hsa-miR-1291	2.25409	0.133282	1
hsa-miR-1292	0.00287206	0.957261	1
hsa-miR-1293	0.135473	0.712828	1
hsa-miR-1294	0.190459	0.66254	1
hsa-miR-1295	0.32531	0.568442	1
hsa-miR-1296	0.432543	0.510753	1
hsa-miR-1297	1.89269	0.168918	1
hsa-miR-1298	0	1	1
hsa-miR-1299	0.00033883	0.985314	1
hsa-miR-1301	0.000933786	0.975622	1
hsa-miR-1304	0.791287	0.373725	1
hsa-miR-1305	0.0122527	0.911862	1
hsa-miR-1306	0.00147992	0.969314	1
hsa-miR-1307	0.000188469	0.989047	1
hsa-miR-130a	0.85461	0.355265	1
hsa-miR-130b	0.000489233	0.982354	1
hsa-miR-132	0.0029723	0.956523	1
hsa-miR-1321	0.0675847	0.79489	1
hsa-miR-1322	0.780171	0.377102	1
hsa-miR-1323	0.229871	0.631626	1
hsa-miR-1324	0.0546681	0.815134	1
hsa-miR-134	0.0979364	0.754324	1
hsa-miR-135b	2.11451	0.145928	1
hsa-miR-136	0.0132075	0.908507	1
hsa-miR-137	0.0173254	0.895282	1
hsa-miR-141	0.130676	0.717737	1
hsa-miR-143	1.02333	0.311747	1
hsa-miR-144	2.17326	0.140447	1
hsa-miR-1468	0.0270645	0.86933	1
hsa-miR-1469	0.313988	0.575251	1
hsa-miR-146a	0.0370717	0.847321	1
hsa-miR-147	0.0586241	0.808687	1
hsa-miR-1470	0.0392538	0.842949	1
hsa-miR-1471	0	1	1
hsa-miR-147b	0.00127962	0.971465	1
hsa-miR-148b	0.000561219	0.9811	1
hsa-miR-149	0.829105	0.362545	1
hsa-miR-150	0.0514935	0.820487	1
hsa-miR-152	0.00733862	0.931733	1
hsa-miR-1537	0.232701	0.629535	1
hsa-miR-1538	0.00313993	0.955315	1
hsa-miR-1539	0.0653146	0.798288	1
hsa-miR-154	0.0141597	0.905281	1
hsa-miR-15a	2.43559	0.118629	1
hsa-miR-15b	0.000317874	0.985775	1
hsa-miR-17	0.0199183	0.887767	1
hsa-miR-181c	0.268577	0.604295	1
hsa-miR-181d	1.00434e-11	0.999997	1
hsa-miR-182	0.101585	0.74994	1
hsa-miR-1825	1.82646	0.176565	1
hsa-miR-1827	0.0676481	0.794796	1
hsa-miR-183	0.0799029	0.777433	1
hsa-miR-184	0.575508	0.44809	1
hsa-miR-185	2.01186	0.156094	1
hsa-miR-186	1.56607	0.210797	1
hsa-miR-187	0.0284971	0.865948	1
hsa-miR-18a	1.08703	0.297145	1
hsa-miR-18b	0.000165116	0.989748	1
hsa-miR-190	0.393909	0.530261	1
hsa-miR-1908	1.69095	0.193494	1
hsa-miR-190b	0.00479455	0.944797	1
hsa-miR-191	0.025399	0.873379	1
hsa-miR-1910	0	1	1
hsa-miR-1912	1.06804	0.301405	1
hsa-miR-1914	0.0508086	0.821665	1
hsa-miR-1915	0.392463	0.531016	1
hsa-miR-192	0.000311514	0.985918	1
hsa-miR-193b	0.0216387	0.883054	1
hsa-miR-195	0.0260003	0.871902	1
hsa-miR-196b	2.18286	0.139575	1
hsa-miR-197	0.00779688	0.929639	1
hsa-miR-1972	0.0311251	0.859964	1
hsa-miR-1973	0.459243	0.497988	1
hsa-miR-1976	0.3912	0.531678	1
hsa-miR-198	0.577874	0.447158	1
hsa-miR-19a	1.70561	0.191574	1
hsa-miR-200a	0.0106935	0.917639	1
hsa-miR-200c	0.000219171	0.988188	1
hsa-miR-202	0	1	1
hsa-miR-203	0.00424042	0.94808	1
hsa-miR-204	0.322738	0.569975	1
hsa-miR-205	1.99427	0.157915	1
hsa-miR-2052	0.0395071	0.84245	1
hsa-miR-2053	0.845571	0.357822	1
hsa-miR-2054	0.0842753	0.771589	1
hsa-miR-208a	0	1	1
hsa-miR-208b	0	1	1
hsa-miR-20a	0.00857123	0.926238	1
hsa-miR-20b	2.51085e-12	0.999999	1
hsa-miR-21	0.308775	0.578441	1
hsa-miR-210	0.00221724	0.962444	1
hsa-miR-211	0.0100047	0.920327	1
hsa-miR-2110	0.340724	0.55942	1
hsa-miR-212	0.00108066	0.973776	1
hsa-miR-214	1.99163	0.15819	1
hsa-miR-215	5.51015e-05	0.994077	1
hsa-miR-216a	0.00555299	0.940599	1
hsa-miR-216b	0.109266	0.740985	1
hsa-miR-217	0.00135909	0.970592	1
hsa-miR-22	0.261285	0.609246	1
hsa-miR-221	0.00910784	0.923971	1
hsa-miR-222	0	1	1
hsa-miR-224	0.0143045	0.904801	1
hsa-miR-23a	0.0111255	0.915998	1
hsa-miR-23b	0	1	1
hsa-miR-25	4.12013e-07	0.999488	1
hsa-miR-26b	0.0768002	0.781685	1
hsa-miR-27a	0.03346	0.854862	1
hsa-miR-27b	2.51085e-12	0.999999	1
hsa-miR-297	0.000731087	0.978429	1
hsa-miR-298	0.80441	0.369792	1
hsa-miR-29a	2.26173	0.132625	1
hsa-miR-29c	0.000154532	0.990082	1
hsa-miR-300	1.23937	0.26561	1
hsa-miR-301a	0.0404958	0.840517	1
hsa-miR-301b	2.19438e-05	0.996262	1
hsa-miR-302a	1.38462	0.239334	1
hsa-miR-302b	0.00517747	0.942639	1
hsa-miR-302c	0.00634847	0.936495	1
hsa-miR-302d	0.00196792	0.964617	1
hsa-miR-302e	0.00754052	0.930803	1
hsa-miR-302f	0	1	1
hsa-miR-30a	0.0785158	0.779323	1
hsa-miR-30b	2.51085e-12	0.999999	1
hsa-miR-30d	2.51085e-12	0.999999	1
hsa-miR-30e	0	1	1
hsa-miR-31	0.0135157	0.90745	1
hsa-miR-32	0.00330033	0.954189	1
hsa-miR-320a	0.231632	0.630323	1
hsa-miR-325	0.0037307	0.951297	1
hsa-miR-326	0.018337	0.892286	1
hsa-miR-328	0.255307	0.61337	1
hsa-miR-335	0.189428	0.663399	1
hsa-miR-33a	0.22878	0.632436	1
hsa-miR-33b	8.26569e-06	0.997706	1
hsa-miR-340	0.0239176	0.877097	1
hsa-miR-345	0.198453	0.655978	1
hsa-miR-34a	0.293188	0.588192	1
hsa-miR-34b	0.0658431	0.797492	1
hsa-miR-363	1.16816e-06	0.999138	1
hsa-miR-367	0	1	1
hsa-miR-370	0.0462783	0.829673	1
hsa-miR-372	0.029547	0.863524	1
hsa-miR-373	0.00811945	0.928203	1
hsa-miR-374a	2.58415	0.107958	1
hsa-miR-374b	0.00097978	0.97503	1
hsa-miR-375	0.404672	0.524696	1
hsa-miR-376b	0.0101014	0.919944	1
hsa-miR-376c	0.510326	0.475008	1
hsa-miR-377	0.102088	0.749343	1
hsa-miR-378	0.000708036	0.978772	1
hsa-miR-379	0.243452	0.621731	1
hsa-miR-380	0.0151694	0.901979	1
hsa-miR-381	0.0657459	0.797638	1
hsa-miR-382	0.000858649	0.976624	1
hsa-miR-383	0.0311343	0.859943	1
hsa-miR-384	0.0319122	0.858223	1
hsa-miR-410	0.00459032	0.945984	1
hsa-miR-411	2.52581	0.112017	1
hsa-miR-421	0.71732	0.397037	1
hsa-miR-422a	8.78668e-06	0.997635	1
hsa-miR-424	0.0465706	0.829145	1
hsa-miR-425	0.160109	0.689061	1
hsa-miR-429	0.0517726	0.82001	1
hsa-miR-431	0.00153025	0.968796	1
hsa-miR-432	0	1	1
hsa-miR-433	0.00830863	0.927373	1
hsa-miR-448	1.05037	0.305438	1
hsa-miR-449a	0.0215823	0.883205	1
hsa-miR-449b	0.020883	0.8851	1
hsa-miR-451	0.0464454	0.829371	1
hsa-miR-452	0.0215604	0.883264	1
hsa-miR-454	0.0221827	0.881604	1
hsa-miR-484	1.19158	0.275027	1
hsa-miR-487a	0	1	1
hsa-miR-487b	0.237943	0.625702	1
hsa-miR-488	2.40853	0.120695	1
hsa-miR-489	0.00277682	0.957975	1
hsa-miR-492	0.00919207	0.923621	1
hsa-miR-493	0.002168	0.962863	1
hsa-miR-494	0.0556719	0.813475	1
hsa-miR-495	0.00426195	0.947949	1
hsa-miR-496	0	1	1
hsa-miR-497	0.0282083	0.866622	1
hsa-miR-498	0	1	1
hsa-miR-503	0.000262676	0.987069	1
hsa-miR-504	0.857414	0.354477	1
hsa-miR-505	0	1	1
hsa-miR-510	0.0398179	0.84184	1
hsa-miR-513b	0.0871294	0.767863	1
hsa-miR-513c	0.00465359	0.945614	1
hsa-miR-517a	0.0441219	0.83363	1
hsa-miR-517b	0.00911332	0.923948	1
hsa-miR-517c	0.000455048	0.982981	1
hsa-miR-518b	0.00387677	0.950354	1
hsa-miR-518c	1.44671e-05	0.996965	1
hsa-miR-518f	0.00011594	0.991409	1
hsa-miR-519d	0.0147577	0.903311	1
hsa-miR-519e	0.00384068	0.950585	1
hsa-miR-520b	0.0946488	0.758352	1
hsa-miR-520e	0.0123098	0.911658	1
hsa-miR-520f	0.410064	0.521946	1
hsa-miR-520g	0.0205561	0.885997	1
hsa-miR-520h	0.000201831	0.988665	1
hsa-miR-522	0.366843	0.544738	1
hsa-miR-523	0	1	1
hsa-miR-526b	0.00735237	0.931669	1
hsa-miR-527	2.00683	0.156611	1
hsa-miR-539	1.40065	0.236632	1
hsa-miR-541	0.391742	0.531394	1
hsa-miR-544	0.221427	0.637961	1
hsa-miR-545	0.00712377	0.932738	1
hsa-miR-548e	0.759297	0.383562	1
hsa-miR-548g	0.502338	0.478485	1
hsa-miR-548j	1.99369	0.157975	1
hsa-miR-548k	0.00785131	0.929395	1
hsa-miR-548l	0.00809763	0.928299	1
hsa-miR-548m	1.22165	0.269053	1
hsa-miR-548n	0.00812035	0.928199	1
hsa-miR-548o	0.0472688	0.827889	1
hsa-miR-549	0.000861658	0.976583	1
hsa-miR-551a	0.0434866	0.834814	1
hsa-miR-551b	0	1	1
hsa-miR-552	0.248998	0.617789	1
hsa-miR-553	0.0476644	0.827181	1
hsa-miR-554	0.0328361	0.856207	1
hsa-miR-555	0.0185226	0.891746	1
hsa-miR-557	0.115911	0.733517	1
hsa-miR-558	0.98749	0.320372	1
hsa-miR-559	0.0815887	0.77516	1
hsa-miR-561	2.51255	0.112962	1
hsa-miR-562	0	1	1
hsa-miR-563	1.14003	0.285663	1
hsa-miR-564	0.00105026	0.974147	1
hsa-miR-566	0.0247183	0.875073	1
hsa-miR-567	0.472503	0.491848	1
hsa-miR-568	0.00618901	0.937296	1
hsa-miR-569	0	1	1
hsa-miR-570	0.0297479	0.863066	1
hsa-miR-571	0.0188623	0.890764	1
hsa-miR-572	0.0491619	0.824531	1
hsa-miR-573	0.139843	0.708442	1
hsa-miR-575	0	1	1
hsa-miR-577	0.419323	0.517284	1
hsa-miR-578	0.155899	0.692966	1
hsa-miR-579	1.43648	0.230727	1
hsa-miR-580	0.0440102	0.833837	1
hsa-miR-581	0.584966	0.444384	1
hsa-miR-583	0.0280911	0.866897	1
hsa-miR-584	0.00250731	0.960065	1
hsa-miR-585	0.156085	0.692792	1
hsa-miR-586	2.16868	0.140866	1
hsa-miR-587	0.0176705	0.89425	1
hsa-miR-589	0.0669424	0.795845	1
hsa-miR-591	0.42451	0.514704	1
hsa-miR-592	0	1	1
hsa-miR-593	0.0121327	0.912293	1
hsa-miR-595	0.00788676	0.929236	1
hsa-miR-596	0.0689656	0.792852	1
hsa-miR-597	0.0834767	0.772644	1
hsa-miR-598	0.837607	0.360096	1
hsa-miR-599	0.00417917	0.948456	1
hsa-miR-600	0.299521	0.584191	1
hsa-miR-601	0.00606002	0.937951	1
hsa-miR-602	0.310127	0.57761	1
hsa-miR-603	0.626626	0.428607	1
hsa-miR-604	0.00540101	0.941416	1
hsa-miR-605	0.00318678	0.954983	1
hsa-miR-606	0	1	1
hsa-miR-607	0.147816	0.700636	1
hsa-miR-608	0.946754	0.330561	1
hsa-miR-609	0.0625907	0.80245	1
hsa-miR-610	0.100889	0.750769	1
hsa-miR-611	0.0728373	0.787253	1
hsa-miR-612	0.27173	0.602181	1
hsa-miR-613	0.0990215	0.753011	1
hsa-miR-614	0.000839191	0.97689	1
hsa-miR-616	0.0113634	0.915108	1
hsa-miR-617	0.00854402	0.926354	1
hsa-miR-618	0.0147847	0.903223	1
hsa-miR-619	0.211895	0.645293	1
hsa-miR-620	0	1	1
hsa-miR-621	0.0411362	0.839278	1
hsa-miR-622	0.0186019	0.891516	1
hsa-miR-623	0.121097	0.727853	1
hsa-miR-624	1.66621	0.196785	1
hsa-miR-625	0.449038	0.502802	1
hsa-miR-626	0.0055591	0.940566	1
hsa-miR-627	0.0103164	0.9191	1
hsa-miR-629	0.00499244	0.943671	1
hsa-miR-630	0.00516433	0.942712	1
hsa-miR-631	0	1	1
hsa-miR-632	0	1	1
hsa-miR-633	0.0814777	0.775309	1
hsa-miR-634	2.5099	0.113153	1
hsa-miR-635	0.021375	0.883764	1
hsa-miR-636	0.151441	0.697167	1
hsa-miR-637	1.01425	0.313901	1
hsa-miR-638	1.19221	0.274901	1
hsa-miR-639	0.121995	0.726885	1
hsa-miR-640	0.365028	0.545736	1
hsa-miR-641	0.487499	0.485055	1
hsa-miR-643	0.284308	0.593899	1
hsa-miR-644	0.0496834	0.823618	1
hsa-miR-645	0	1	1
hsa-miR-646	0.00116275	0.972799	1
hsa-miR-647	0.760624	0.383146	1
hsa-miR-648	0.0297198	0.86313	1
hsa-miR-649	0.00242276	0.960743	1
hsa-miR-651	0.0128089	0.909892	1
hsa-miR-652	0.304518	0.581072	1
hsa-miR-653	0.00778164	0.929708	1
hsa-miR-655	0.0168787	0.896633	1
hsa-miR-656	0.171647	0.678658	1
hsa-miR-657	0.0176476	0.894318	1
hsa-miR-658	0.0593737	0.807492	1
hsa-miR-659	0.309916	0.577739	1
hsa-miR-660	0.237995	0.625665	1
hsa-miR-661	0.625761	0.428926	1
hsa-miR-662	0.29536	0.586814	1
hsa-miR-663	0.0171262	0.895882	1
hsa-miR-663b	0.0425752	0.83653	1
hsa-miR-664	0.248143	0.618392	1
hsa-miR-665	0.251302	0.616167	1
hsa-miR-668	0.580942	0.445955	1
hsa-miR-675	0.0041886	0.948398	1
hsa-miR-708	0.0222934	0.881311	1
hsa-miR-720	0	1	1
hsa-miR-744	0.137139	0.711147	1
hsa-miR-758	0.0835156	0.772592	1
hsa-miR-760	0.360222	0.548392	1
hsa-miR-765	0.0620174	0.803338	1
hsa-miR-766	0.817994	0.365781	1
hsa-miR-802	0	1	1
hsa-miR-873	2.1353	0.143962	1
hsa-miR-874	1.06252	0.302658	1
hsa-miR-877	0.0422721	0.837105	1
hsa-miR-887	0.00502593	0.943483	1
hsa-miR-888	0.871959	0.350428	1
hsa-miR-889	0.219711	0.639266	1
hsa-miR-890	0.00306643	0.95584	1
hsa-miR-891a	0.364712	0.545909	1
hsa-miR-891b	0.237351	0.626133	1
hsa-miR-892a	0.112238	0.737615	1
hsa-miR-920	0.0274832	0.868332	1
hsa-miR-921	0.00194055	0.964864	1
hsa-miR-922	0.273628	0.600915	1
hsa-miR-924	0.0105156	0.918325	1
hsa-miR-92b	0	1	1
hsa-miR-93	0.0135293	0.907404	1
hsa-miR-933	0.296663	0.58599	1
hsa-miR-934	0.0351815	0.851218	1
hsa-miR-935	0	1	1
hsa-miR-938	0	1	1
hsa-miR-939	0.0910311	0.762874	1
hsa-miR-940	2.62924	0.104931	1
hsa-miR-942	0.0519075	0.81978	1
hsa-miR-943	0.00154218	0.968675	1
hsa-miR-944	0.153895	0.694846	1
hsa-miR-95	0.0230365	0.879364	1
hsa-miR-96	0.020881	0.885105	1
hsa-miR-98	0.0323672	0.857226	1
hsa-miR-99a	0.0114189	0.914902	1
hsa-miR-99b	0	1	1
